# Supplementary material
Source: PubMed Central journal article supplement (PMC5850861)
Supplement: dex338suppl_figure1.pdf [file dex338suppl_figure1.pdf]

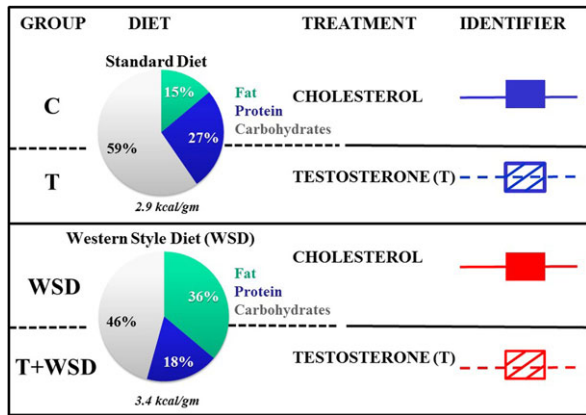

**Supplementary Figure S1** Details of androgen and diet treatments. Identifiers are color code used within graphs of the article's figures.
