# Supplementary material
Source: PubMed Central journal article supplement (PMC5850861)
Supplement: dex338suppl_figure2.pdf [file dex338suppl_figure2.pdf]

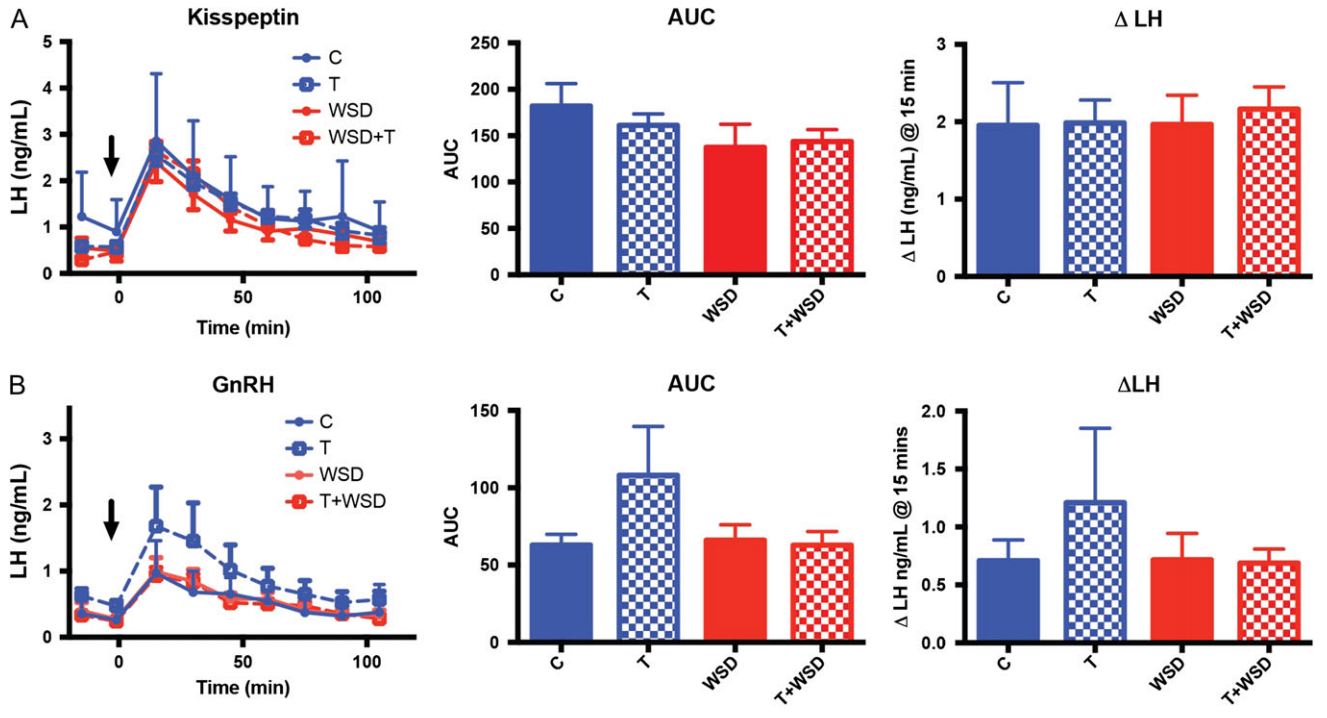

**Supplementary Figure S2** Pituitary LH response to kisspeptin and GnRH stimulation. **(A)** Following sedation with isoflurane animals were administered (A) kisspeptin at 8 ug/kg intravenously during the luteal phase (Days 17–21) and **(B)** GnRH at 250 ng/kg intravenously during the early follicular phase (Days 0–5). Blood was collected every 15 min for a total of 105 min following administration. Area under the curve (AUC) and the change in LH from 0 to 15 min was calculated for both tests. Arrow indicates time of administration corresponding to time 0. C, control; T, testosterone; WSD, western-style diet.
