# Supplementary material
Source: PubMed Central journal article supplement (PMC5850861)
Supplement: dex338suppl_figure3.pdf [file dex338suppl_figure3.pdf]

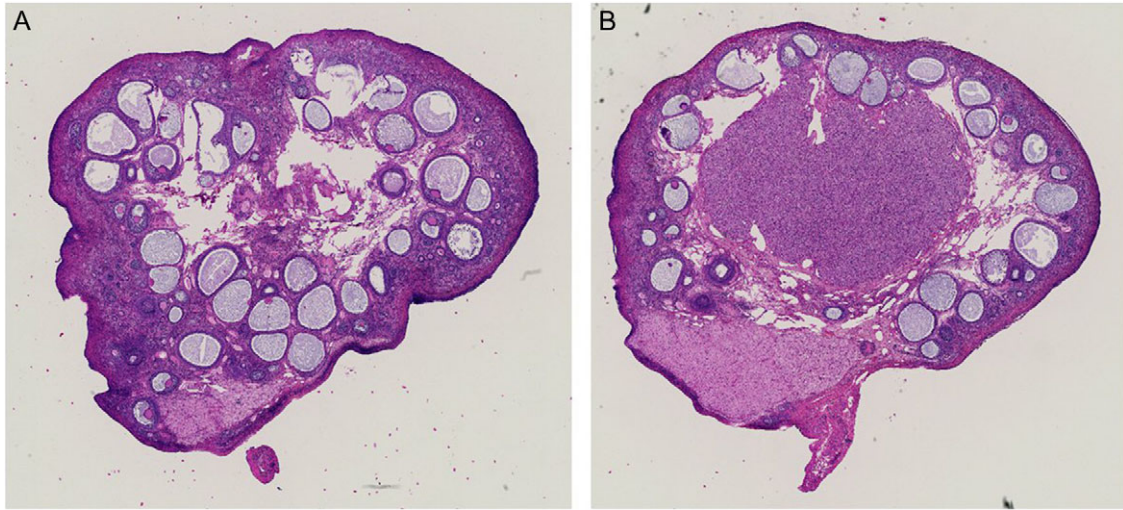

**Supplemental Figure S3** Ovary recovered from one T+WSD female following ~3 years of treatment. This ovary was fixed overnight at 4°C in 5% neutral formalin dissolved in phosphate buffered saline, then paraffin embedded. Ovarian sections (5 µm) were rehydrated and processed for hematoxylin and eosin staining similar to previous studies (Bishop et al. PMID: PMC4821692). Panel (A) and (B) depict sections from this same ovary near the ovarian medulla (B) and closer to the ovarian cortex (A).
