# Supplementary material
Source: PubMed Central journal article supplement (PMC5850861)
Supplement: dex338suppl_table1.pdf [file dex338suppl_table1.pdf]

**Supplementary Table S1 Real-time PCR primers and probes.**

| <b>Target</b>      | <b>Accession number</b> | <b>Forward primer</b>  | <b>Reverse primer</b>  | <b>Probe</b>               |
|--------------------|-------------------------|------------------------|------------------------|----------------------------|
| RPS10 <sup>a</sup> | NM_001193579.1          | AATGTGCCCAACCTTCATGTC  | TCCAGGCAAACCTGTTCTTCA  | TGAAGCCATGCAGTCTCTCAAGTCCC |
| ESR1               | XM_004011538.1          | CTGAGCGACCTCACTTTCAC   | CCAGAGTGCCTGCTCCTTT    | TTTCAGGCTGTGACCAAGGGC      |
| PGR                | XM_004016530.1          | GGCACTGAGTGTTGAATTTCCA | CACCATCCCTGCCAAGATC    | TGATGTCTGAGGTTATCGCTGCACA  |
| MMP26              | XM_015115062.1          | CCTGCAGCACTCTGGGAATC   | TTCCAGGGTCGTGATACCAGTA | AGCTCCATAATGTACCCC         |
| TIMP3              | NM_001032956.1          | GGACCGACATGCTCTCCAAT   | CGGATGCAGGCATAGTGTGTTG | TTCGGCTACCCTGGCTACCA       |

<sup>a</sup>Endogenous control primer.
